# Supplementary material for: The preventive effect of solubilized sturgeon oil on dextran sulfate sodium-induced ulcerative colitis via inflammation attenuation and intestinal microbiota regulation
Source: Royal Society of Chemistry journal article supplement (doi:10.1039/d5fo01038a), 2025-01-01
Supplement: d5fo01038a1.pdf [file d5fo01038a1.pdf]

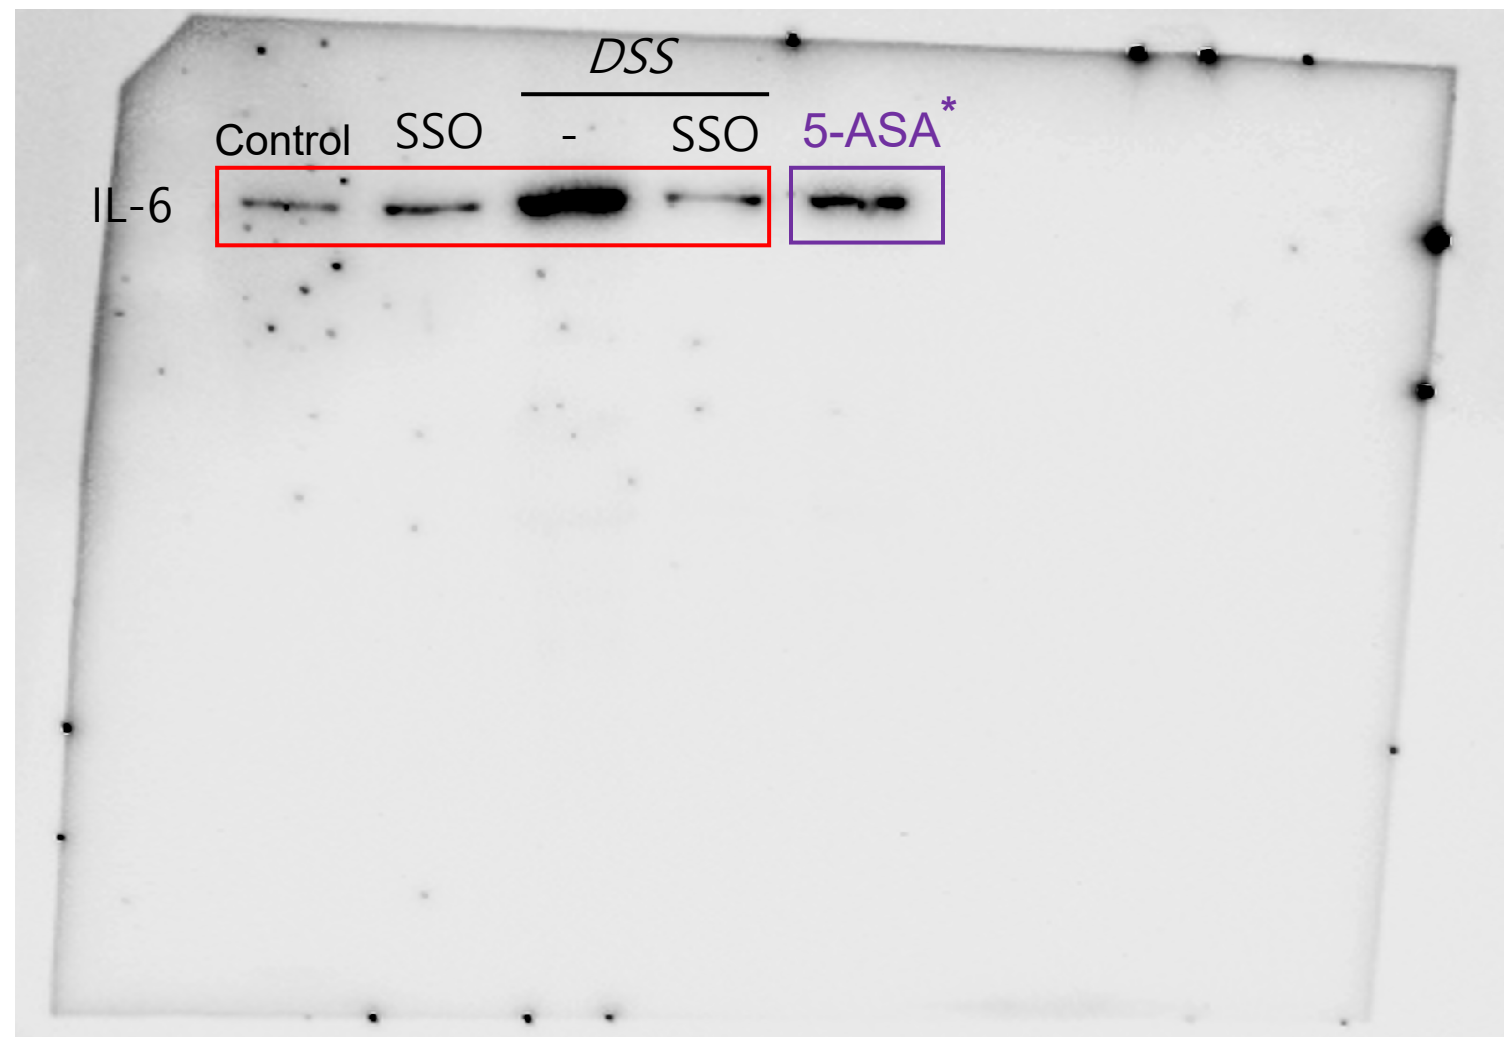

5-ASA\*: 5-ASA group was used as a control for colitis treatment but was excluded from the experimental group as it was not suitable for the purpose of the study to investigate preventive efficacy.

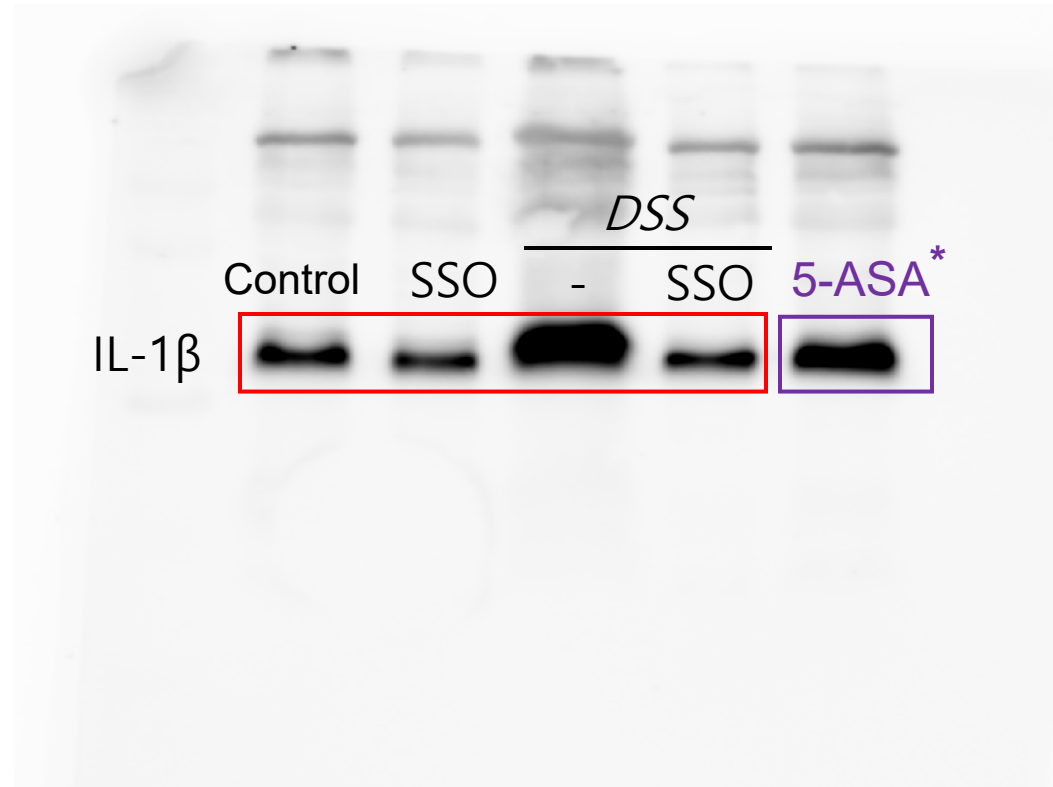

5-ASA\*: 5-ASA group was used as a control for colitis treatment but was excluded from the experimental group as it was not suitable for the purpose of the study to investigate preventive efficacy.

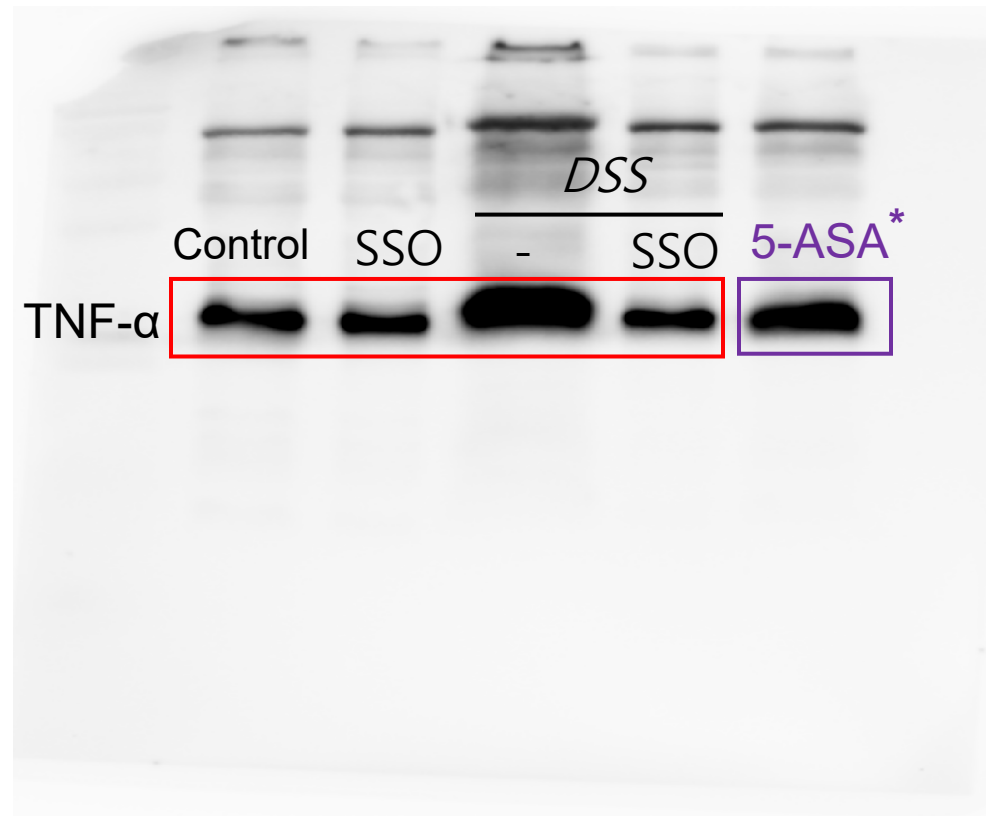

5-ASA\*: 5-ASA group was used as a control for colitis treatment but was excluded from the experimental group as it was not suitable for the purpose of the study to investigate preventive efficacy.

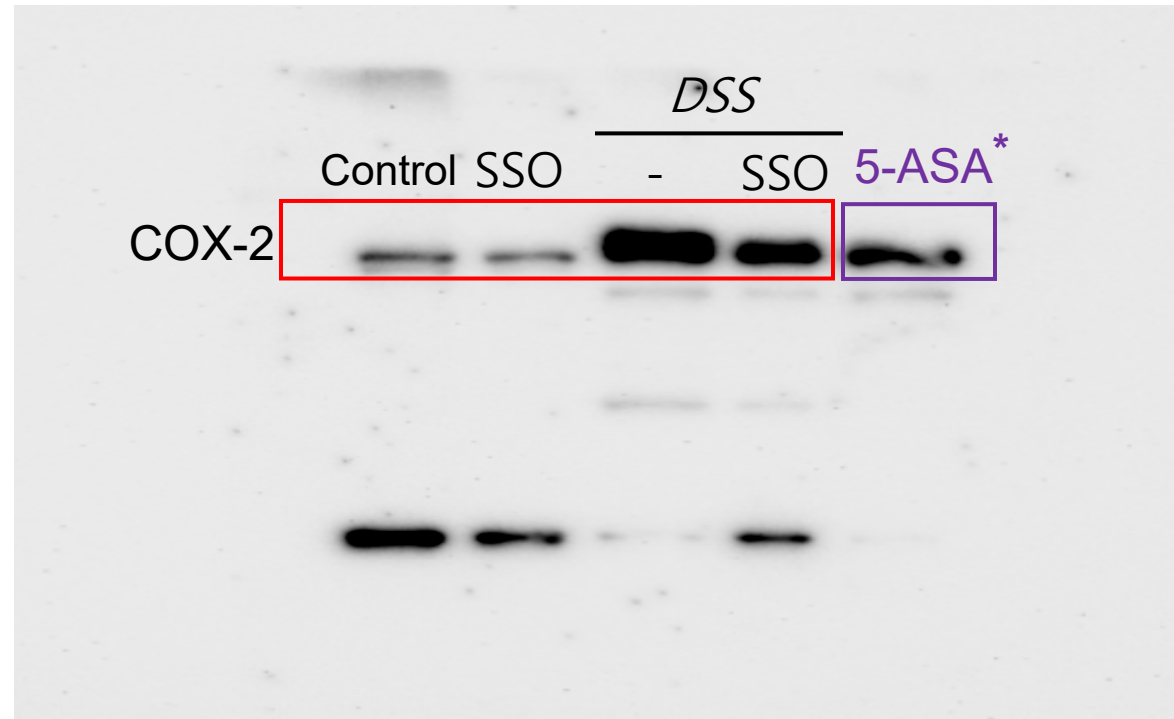

5-ASA\*: 5-ASA group was used as a control for colitis treatment but was excluded from the experimental group as it was not suitable for the purpose of the study to investigate preventive efficacy.

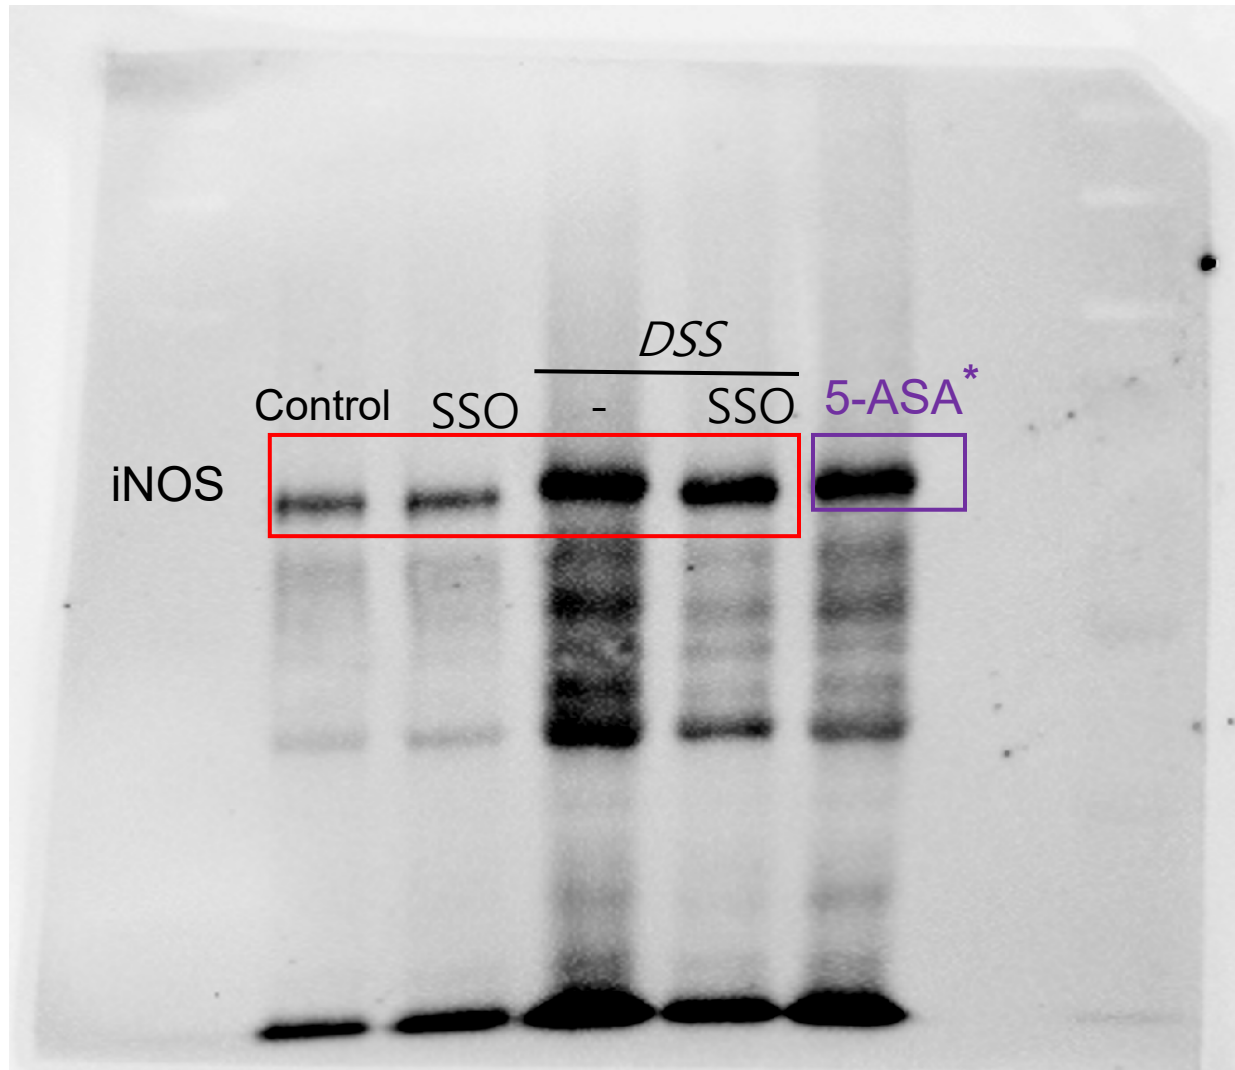

5-ASA\*: 5-ASA group was used as a control for colitis treatment but was excluded from the experimental group as it was not suitable for the purpose of the study to investigate preventive efficacy.

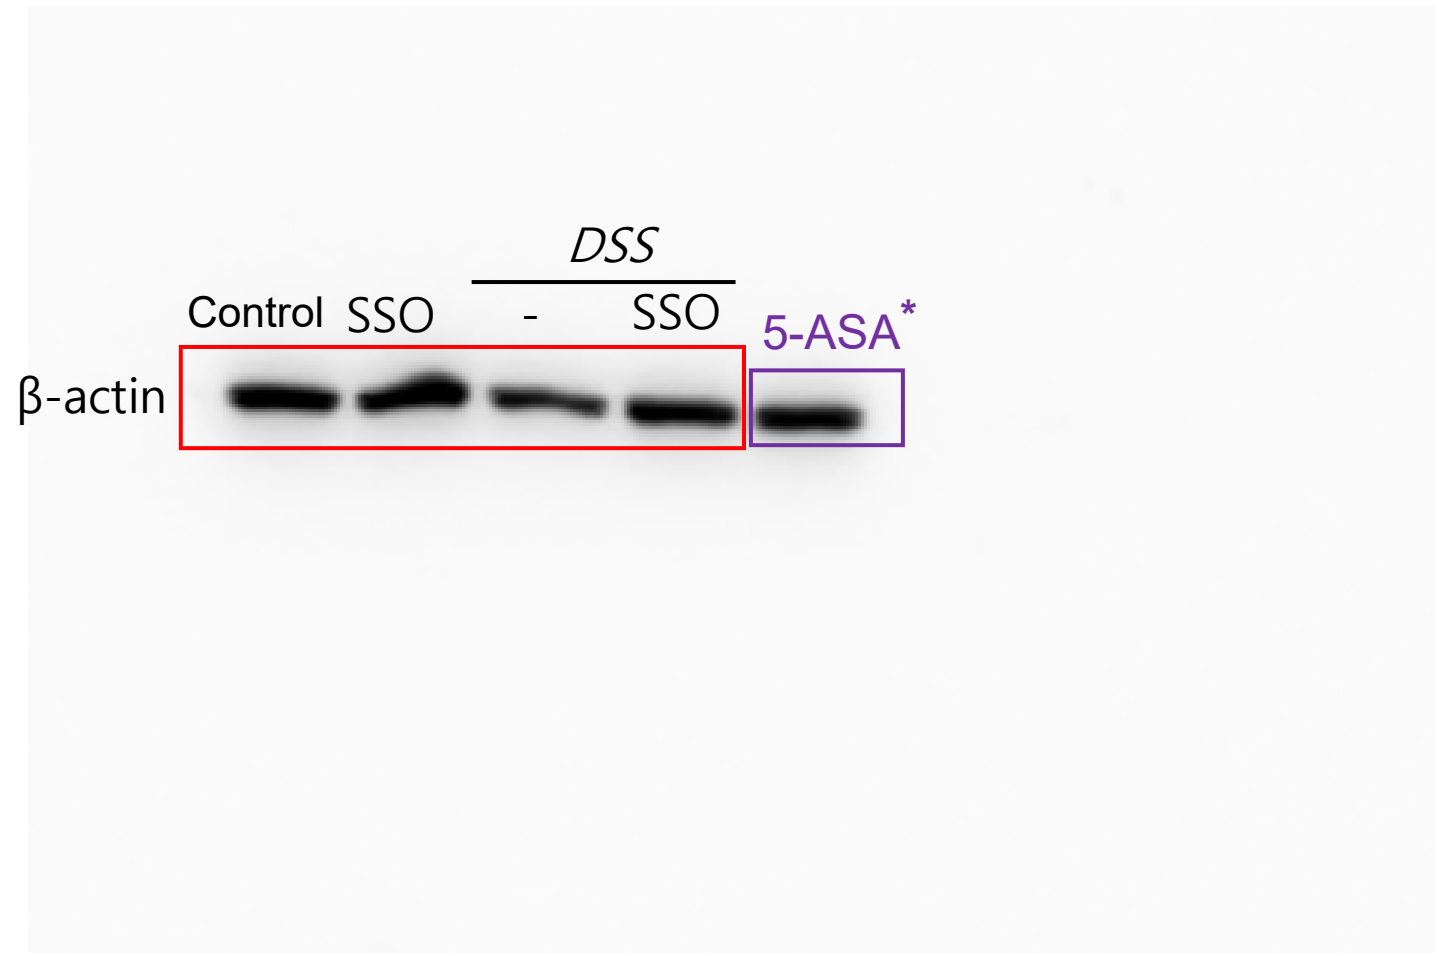

5-ASA\*: 5-ASA group was used as a control for colitis treatment but was excluded from the experimental group as it was not suitable for the purpose of the study to investigate preventive efficacy.

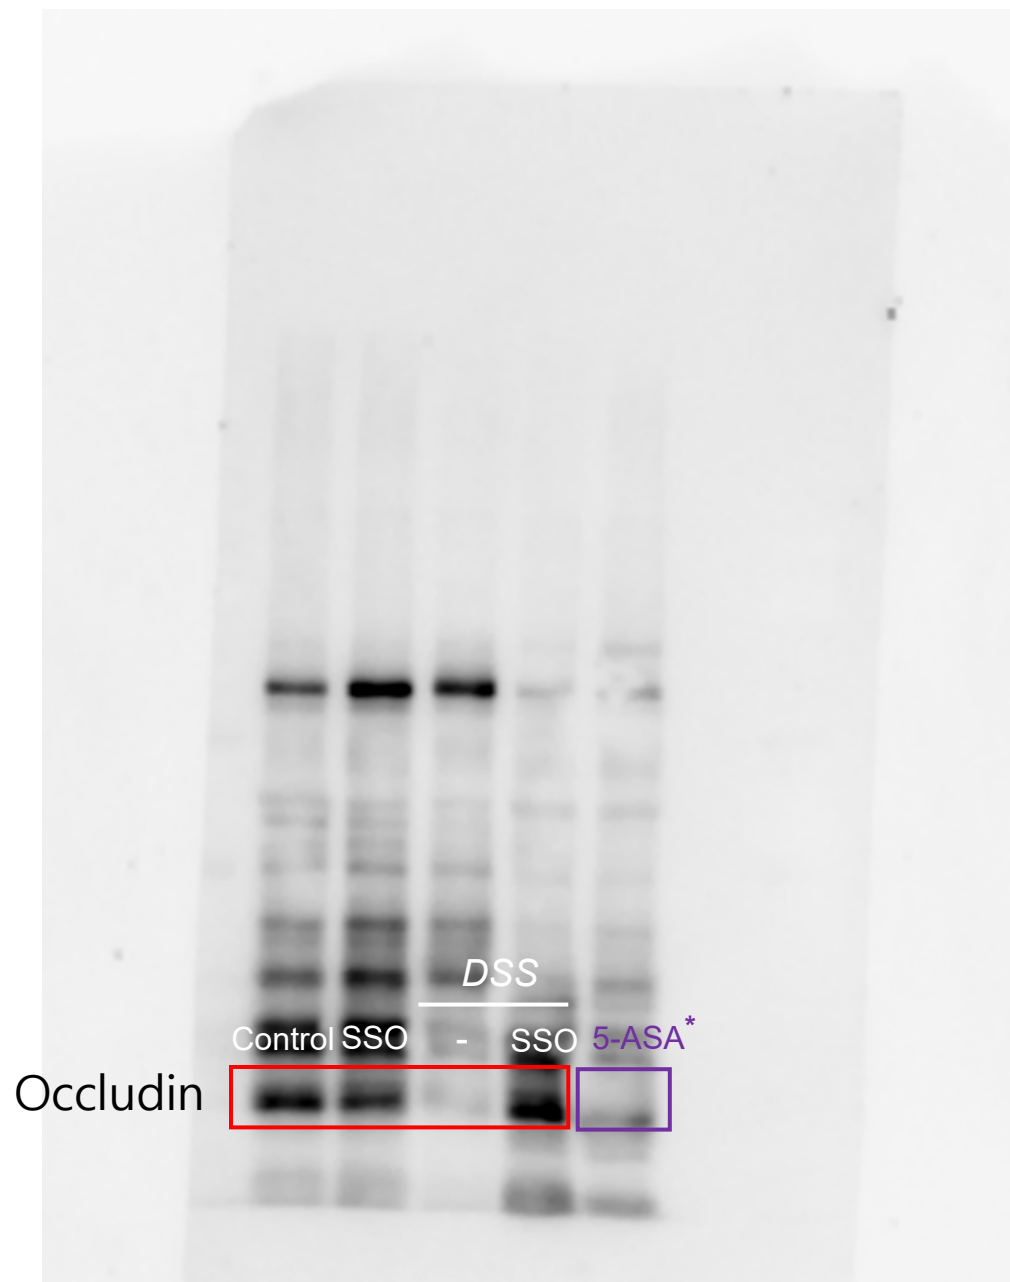

5-ASA\*: 5-ASA group was used as a control for colitis treatment but was excluded from the experimental group as it was not suitable for the purpose of the study to investigate preventive efficacy.

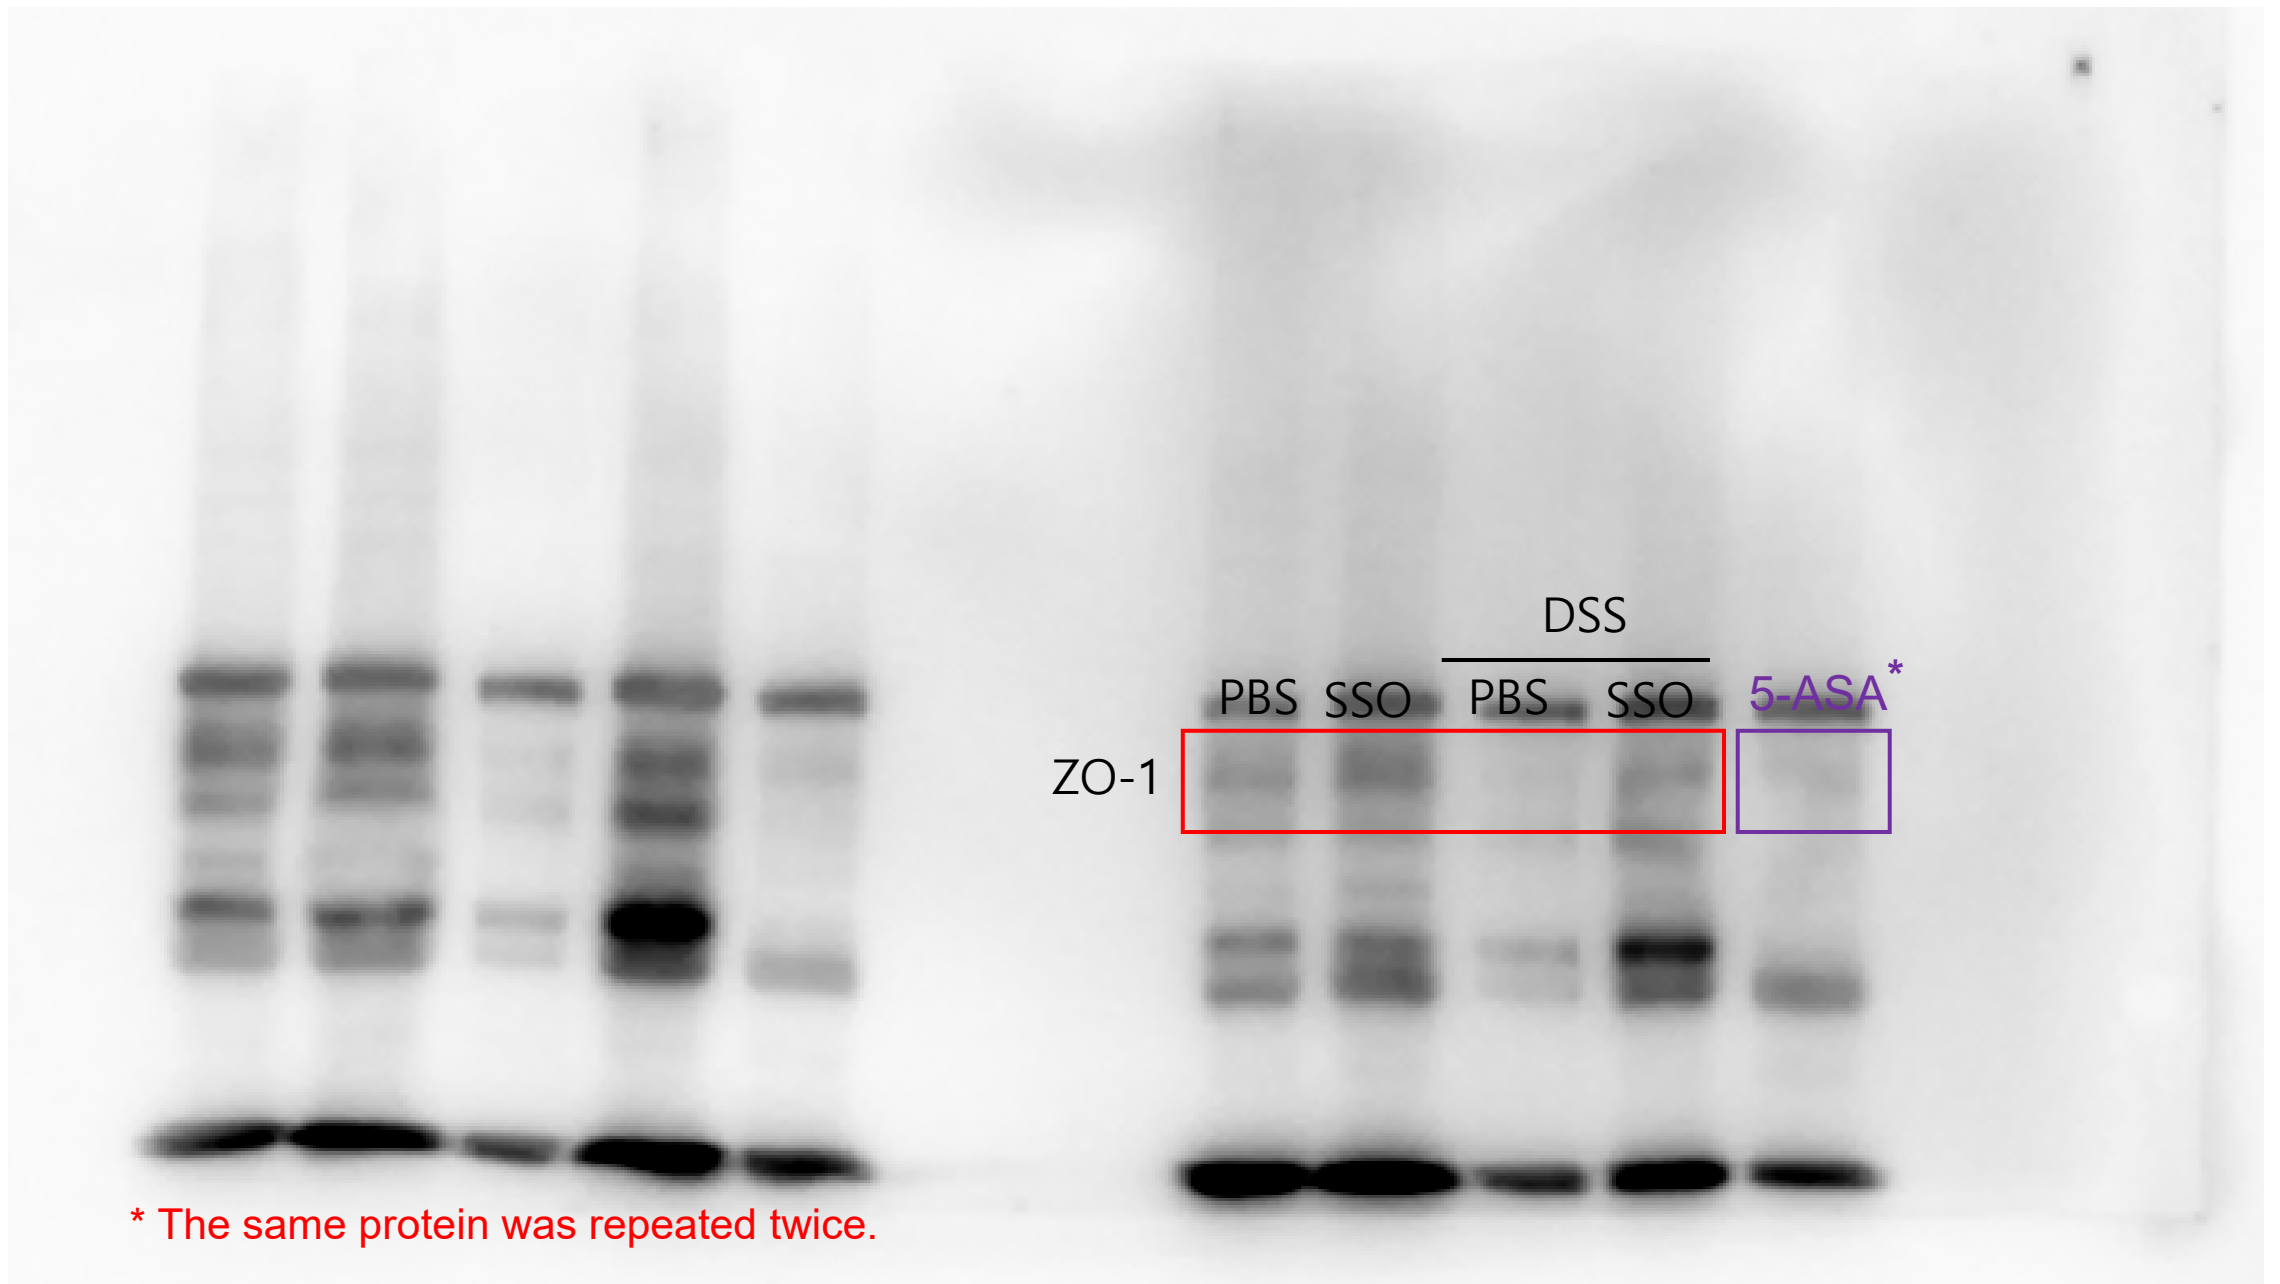

5-ASA\*: 5-ASA group was used as a control for colitis treatment but was excluded from the experimental group as it was not suitable for the purpose of the study to investigate preventive efficacy.



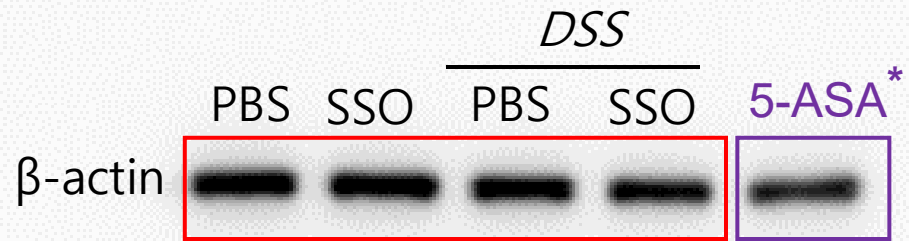

5-ASA\*: 5-ASA group was used as a control for colitis treatment but was excluded from the experimental group as it was not suitable for the purpose of the study to investigate preventive efficacy.
